# Supplementary material for: Metabotyping of 30 maize hybrids under early-sowing conditions reveals potential marker-metabolites for breeding
Source: PubMed Central journal article supplement (PMC6208756; doi:10.1007/s11306-018-1427-8), 2018-09-26
Supplement: 11306_2018_1427_MOESM3_ESM.pdf [file 11306_2018_1427_MOESM3_ESM.pdf]

**Supplementary Table S2:** Table of chemical shifts used for identification and quantification of metabolites in  $^1\text{H}$ -NMR spectra of polar extracts (in deuterated phosphate buffer solution, apparent pH 6.0) of maize leaf, expressed as relative values to the TSP resonance at 0 ppm. s: singlet, d: doublet, bd: broad doublet, dd: doublet of doublets, t: triplet, td: triplet of doublets, m: multiplet.

| Compounds                                                      | Assignment                | $^1\text{H}$ Chemical shift (ppm) | $^1\text{H}$ Pattern | Use (quantification or detection) | MSI status <sup>a</sup> |
|----------------------------------------------------------------|---------------------------|-----------------------------------|----------------------|-----------------------------------|-------------------------|
| Alanine                                                        | $\beta\text{-CH}_3$       | 1.487                             | d                    | q                                 | 1                       |
| Betaine                                                        | $\text{N-CH}_3$           | 3.27                              | s                    | q                                 | 1                       |
| Chlorogenate1 (hydroxycinnamic-containing compound)            | =CH                       | 6.42                              | d                    | q                                 | 3                       |
|                                                                | $\text{CH}_{\text{arom}}$ | 6.93                              | d                    | d                                 |                         |
|                                                                | $\text{CH}_{\text{arom}}$ | 7.12                              | dd                   | d                                 |                         |
|                                                                | $\text{CH}_{\text{arom}}$ | 7.19                              | d                    | d                                 |                         |
|                                                                | =CH                       | 7.63                              | d                    | d                                 |                         |
| Chlorogenate2 (hydroxycinnamic and quinic-containing compound) | =CH                       | 6.36                              | d                    | q                                 | 2                       |
|                                                                | $\text{CH}_{\text{arom}}$ | 6.98                              | d                    | d                                 |                         |
|                                                                | $\text{CH}_{\text{arom}}$ | 7.09                              | dd                   | d                                 |                         |
|                                                                | $\text{CH}_{\text{arom}}$ | 7.16                              | d                    | d                                 |                         |
|                                                                | =CH                       | 7.62                              | d                    | d                                 |                         |
|                                                                | quinic H5                 | 5.32                              | m                    | d                                 |                         |
|                                                                | quinic H?                 | 4.25                              | m                    | d                                 |                         |
| Choline                                                        | $\text{N-CH}_3$           | 3.2                               | s                    | q                                 | 1                       |
|                                                                | $\text{N-CH}_2$           | 3.53                              | m                    | d                                 |                         |
| Citrate                                                        | $\text{CH}_2$             | 2.7                               | d                    | q                                 | 1                       |
|                                                                | $\text{CH}_2$             | 2.55                              | d                    | d                                 |                         |
| Fructose                                                       |                           | 4.12                              | m                    | q                                 | 1                       |
| Glucose                                                        | $\alpha\text{-CH}$        | 5.24                              | d                    | q                                 | 1                       |
|                                                                | $\beta\text{-CH}$         | 4.65                              | d                    | q                                 | 1                       |
| Glutamate                                                      | $\gamma\text{-CH}_2$      | 2.36                              | td                   | q                                 | 1                       |
| Glycine                                                        | $\alpha\text{-CH}$        | 3.56                              | s                    | q                                 | 1                       |
| Inositol                                                       | $\text{C}_5\text{H}$      | 3.29                              | t                    | q                                 | 1                       |
| Isoleucine                                                     | $\delta\text{-CH}_3$      | 0.94                              | t                    | d                                 | 1                       |
|                                                                | $\gamma'\text{-CH}_3$     | 1.01                              | d                    | q                                 |                         |
| Leucine                                                        | $\delta\text{-CH}_3$      | 0.96                              | d                    | d                                 | 1                       |
|                                                                | $\delta'\text{-CH}_3$     | 0.97                              | d                    | d                                 | 1                       |
| Malate                                                         | $\alpha\text{-CH}$        | 4.31                              | dd                   | q                                 | 1                       |
|                                                                | $\beta\text{-CH}$         | 2.68                              | dd                   | d                                 |                         |
|                                                                | $\beta'\text{-CH}$        | 2.39                              | dd                   | d                                 |                         |
| Putrescine                                                     | $\text{CH}_2$             | 1.77                              | m                    | q                                 | 1                       |

|                                             |                    |      |    |   |   |
|---------------------------------------------|--------------------|------|----|---|---|
| <b>Putrescine</b>                           | N-CH <sub>2</sub>  | 3.06 | m  | d |   |
| <b>Quinate1</b>                             |                    | 1.93 | dd | q | 3 |
| <b>Quinate2 (probably free quinic acid)</b> |                    | 1.88 | dd | q | 3 |
|                                             |                    | 1.96 | m  | d |   |
|                                             |                    | 1.98 | m  | d |   |
|                                             |                    | 2.04 | d  | d |   |
|                                             |                    | 2.07 | m  | d |   |
|                                             |                    | 4.03 | m  | d |   |
|                                             | 4.15               | dd   | d  |   |   |
| <b>Raffinose</b>                            |                    | 4.99 | d  | q | 2 |
| <b>Rhamnose</b>                             |                    | 5.12 | d  | q | 1 |
|                                             |                    | 1.3  | d  | d |   |
|                                             |                    | 1.28 | d  | d |   |
| <b>Shikimate</b>                            |                    | 4.04 | dd | q | 1 |
|                                             |                    | 2.79 | bd | d |   |
|                                             |                    | 2.75 | bd | d |   |
| <b>Succinate</b>                            | CH <sub>2</sub>    | 2.42 | s  | q | 1 |
| <b>Sucrose</b>                              |                    | 5.42 | d  | q | 1 |
|                                             |                    | 4.22 | d  | d |   |
|                                             |                    | 4.06 | t  | d |   |
|                                             |                    | 3.9  | m  | d |   |
|                                             |                    | 3.82 | m  | d |   |
|                                             |                    | 3.77 | t  | d |   |
|                                             |                    | 3.68 | s  | d |   |
|                                             |                    | 3.57 | dd | d |   |
|                                             | 3.48               | t    | d  |   |   |
| <b>Trans-aconitate</b>                      | =CH                | 6.62 | s  | q | 1 |
|                                             | CH <sub>2</sub>    | 3.47 | s  | d |   |
| <b>Trigonelline</b>                         | =CH-N              | 9.12 | s  | q | 1 |
|                                             | CH-C=C-N           | 8.84 | m  | d |   |
|                                             | CH=C-N             | 8.09 | t  | d |   |
|                                             | CH <sub>3</sub>    | 4.45 | s  | d |   |
| <b>Valine</b>                               | γ'-CH <sub>3</sub> | 0.99 | d  | q | 1 |
| <b>Unknown compounds</b>                    |                    |      |    |   |   |
| <b>UnkD0.65</b>                             |                    | 0.65 | d  | q | 4 |
| <b>UnkD0.68</b>                             |                    | 0.68 | d  | q | 4 |
| <b>UnkD1.44</b>                             |                    | 1.44 | d  | q | 4 |
| <b>UnkM2.91</b>                             |                    | 2.91 | m  | q | 4 |
| <b>UnkM5.39</b>                             |                    | 5.39 | m  | q | 4 |

<sup>a</sup> Identification status according to MSI (Sumner *et al.*, 2007): 1, Identified compounds (checked with standard); 2, Putatively annotated compounds; 3, Putatively characterized compound classes; 4, Unknown.
