# Supplementary material for: Metabotyping of 30 maize hybrids under early-sowing conditions reveals potential marker-metabolites for breeding
Source: PubMed Central journal article supplement (PMC6208756; doi:10.1007/s11306-018-1427-8), 2018-09-26
Supplement: 11306_2018_1427_MOESM4_ESM.pdf [file 11306_2018_1427_MOESM4_ESM.pdf]

**Supplementary Table S3:** LC-QTOF-MS and MS/MS data of identified compounds in maize leaves in negative ion-mode.

| RT (min) | Measured $m/z$ of [M-H] <sup>-</sup> | MS spectrum ions                                                                                                                                                                             | Putative Molecular Formula of [M-H] <sup>-</sup>              | Calculated $m/z$ of [M-H] <sup>-</sup> | Error (mDa) | Error (ppm) | mSigma value | Putative Assignment            | ChEBI ID     | LC-MS/MS in negative mode <sup>a</sup>                                                                                                                                                                                                                                                                                                                                                                                                                                                         | Comparison with Spectral DB <sup>b</sup> | Comparison with chemical standard | MSI level <sup>c</sup> | Variable associated to [M-H] <sup>-</sup> |
|----------|--------------------------------------|----------------------------------------------------------------------------------------------------------------------------------------------------------------------------------------------|---------------------------------------------------------------|----------------------------------------|-------------|-------------|--------------|--------------------------------|--------------|------------------------------------------------------------------------------------------------------------------------------------------------------------------------------------------------------------------------------------------------------------------------------------------------------------------------------------------------------------------------------------------------------------------------------------------------------------------------------------------------|------------------------------------------|-----------------------------------|------------------------|-------------------------------------------|
| 4.78     | 203.0828                             | -                                                                                                                                                                                            | C <sub>11</sub> H <sub>11</sub> N <sub>2</sub> O <sub>2</sub> | 203.0826                               | -0.2        | -1.1        | 3.9          | Tryptophan                     |              | Signal too low                                                                                                                                                                                                                                                                                                                                                                                                                                                                                 | -                                        | yes                               | 1                      | M203T290                                  |
| 6.75     | 342.0831                             | 180.0297 [(M-H)-C <sub>6</sub> H <sub>10</sub> O <sub>5</sub> ] <sup>-</sup><br>685.1680 [2M-H] <sup>-</sup>                                                                                 | C <sub>14</sub> H <sub>16</sub> NO <sub>9</sub>               | 342.031                                | -0.1        | -0.2        | 0.7          | DIBOA-glucoside                | CHEBI:80091  | 180.0304 [(M-H)-C <sub>6</sub> H <sub>10</sub> O <sub>5</sub> ] <sup>-</sup><br>162.0206 [(M-H)-C <sub>6</sub> H <sub>12</sub> O <sub>6</sub> ] <sup>-</sup><br>152.0351 [(M-H)-C <sub>7</sub> H <sub>10</sub> O <sub>6</sub> ] <sup>-</sup>                                                                                                                                                                                                                                                   | -                                        | no                                | 3                      | M342T407                                  |
| 10.41    | 337.0921                             | 163.0395 [(M-H)-C <sub>7</sub> H <sub>10</sub> O <sub>5</sub> ] <sup>-</sup><br>675.1817 [2M-H] <sup>-</sup>                                                                                 | C <sub>16</sub> H <sub>17</sub> O <sub>8</sub>                | 337.0929                               | 0.8         | 2.4         | 2.6          | Coumaroylquinic acid A         | -            | 191.0559 [(M-H)-C <sub>9</sub> H <sub>6</sub> O <sub>2</sub> ] <sup>-</sup><br>173.0454 [(M-H)-C <sub>9</sub> H <sub>8</sub> O <sub>3</sub> ] <sup>-</sup><br>163.0397 [(M-H)-C <sub>7</sub> H <sub>10</sub> O <sub>5</sub> ] <sup>-</sup>                                                                                                                                                                                                                                                     | -                                        | no                                | 2                      | M337T627                                  |
| 11.79    | 353.0861                             | 191.0557 [(M-H)-C <sub>9</sub> H <sub>6</sub> O <sub>3</sub> ] <sup>-</sup><br>707.1702 [2M-H] <sup>-</sup>                                                                                  | C <sub>16</sub> H <sub>17</sub> O <sub>9</sub>                | 353.0978                               | 1.7         | 4.9         | 3.2          | 3-O-Caffeoylquinic acid        | CHEBI:16112  | 191.0565 [(M-H)-C <sub>9</sub> H <sub>6</sub> O <sub>3</sub> ] <sup>-</sup><br>179.0343 [(M-H)-C <sub>7</sub> H <sub>10</sub> O <sub>5</sub> ] <sup>-</sup><br>173.0451 [(M-H)-C <sub>9</sub> H <sub>8</sub> O <sub>4</sub> ] <sup>-</sup><br>161.0246 [(M-H)-C <sub>7</sub> H <sub>12</sub> O <sub>6</sub> ] <sup>-</sup>                                                                                                                                                                     | MoNA<br>mzCloud                          | yes                               | 1                      | M353T707                                  |
| 12.39    | 367.1018                             | 193.0499 [(M-H)-C <sub>7</sub> H <sub>10</sub> O <sub>5</sub> ] <sup>-</sup><br>735.1971 [2M-H] <sup>-</sup>                                                                                 | C <sub>17</sub> H <sub>19</sub> O <sub>9</sub>                | 367.1035                               | 1.7         | 4.6         | 20.2         | Feruloylquinic acid B          | -            | 193.0507 [(M-H)-C <sub>7</sub> H <sub>10</sub> O <sub>5</sub> ] <sup>-</sup><br>191.0562 [(M-H)-C <sub>10</sub> H <sub>8</sub> O <sub>3</sub> ] <sup>-</sup><br>173.0459 [(M-H)-C <sub>10</sub> H <sub>10</sub> O <sub>4</sub> ] <sup>-</sup>                                                                                                                                                                                                                                                  | -                                        | no                                | 2                      | M367T741                                  |
| 12.65    | 353.0864                             | 173.0446 [(M-H)-C <sub>9</sub> H <sub>8</sub> O <sub>4</sub> ] <sup>-</sup><br>707.1705 [2M-H] <sup>-</sup>                                                                                  | C <sub>16</sub> H <sub>17</sub> O <sub>9</sub>                | 353.0878                               | 1.2         | 3.5         | 29.7         | 4-O-Caffeoylquinic acid        | CHEBI:75491  | 191.0563 [(M-H)-C <sub>9</sub> H <sub>6</sub> O <sub>3</sub> ] <sup>-</sup><br>179.0351 [(M-H)-C <sub>7</sub> H <sub>10</sub> O <sub>5</sub> ] <sup>-</sup><br>173.0456 [(M-H)-C <sub>9</sub> H <sub>8</sub> O <sub>4</sub> ] <sup>-</sup><br>161.0250 [(M-H)-C <sub>7</sub> H <sub>12</sub> O <sub>6</sub> ] <sup>-</sup>                                                                                                                                                                     | -                                        | yes                               | 1                      | M353T757                                  |
| 13.18    | 356.1008                             | 194.0481 [(M-H)-C <sub>6</sub> H <sub>10</sub> O <sub>5</sub> ] <sup>-</sup><br>713.2035 [2M-H] <sup>-</sup>                                                                                 | C <sub>15</sub> H <sub>18</sub> NO <sub>9</sub>               | 356.0987                               | -2.1        | -5.8        | 45.1         | HMBOA-glucoside                | CHEBI:134457 | 341.0738 [(M-H)-CH <sub>3</sub> *] <sup>-</sup><br>194.0458 [(M-H)-C <sub>6</sub> H <sub>10</sub> O <sub>5</sub> ] <sup>-</sup><br>179.0221 [(M-H)-C <sub>6</sub> H <sub>10</sub> O <sub>5</sub> CH <sub>3</sub> *] <sup>-</sup><br>166.0505 [v-C <sub>7</sub> H <sub>10</sub> O <sub>6</sub> ] <sup>-</sup>                                                                                                                                                                                   | -                                        | no                                | 3                      | M356T796                                  |
| 13.40    | 372.0932                             | 192.0300 [(M-H)-C <sub>6</sub> H <sub>12</sub> O <sub>6</sub> ] <sup>-</sup><br>210.0413 [(M-H)-C <sub>6</sub> H <sub>10</sub> O <sub>5</sub> ] <sup>-</sup><br>745.1920 [2M-H] <sup>-</sup> | C <sub>15</sub> H <sub>18</sub> NO <sub>10</sub>              | 372.0936                               | 0.4         | 1.1         | 5.0          | DIMBOA-glucoside               | CHEBI:16603  | 210.0407 [(M-H)-C <sub>6</sub> H <sub>10</sub> O <sub>5</sub> ] <sup>-</sup><br>192.0274 [(M-H)-C <sub>6</sub> H <sub>12</sub> O <sub>6</sub> ] <sup>-</sup><br>189.0050 [(M-H)-C <sub>9</sub> H <sub>13</sub> NO <sub>3</sub> ] <sup>-</sup><br>164.0344 [(M-H)-C <sub>7</sub> H <sub>12</sub> O <sub>7</sub> ] <sup>-</sup><br>149.0111 [(M-H)-C <sub>8</sub> H <sub>15</sub> O <sub>7</sub> *] <sup>-</sup>                                                                                 | -                                        | no                                | 3                      | M372T817                                  |
| 13.67    | 402.1019                             | 805.1879 [2M-H] <sup>-</sup>                                                                                                                                                                 | C <sub>16</sub> H <sub>20</sub> NO <sub>11</sub>              | 402.1042                               | 2.3         | 5.8         | 6.2          | DIM <sub>2</sub> BOA-glucoside | -            | 194.0437 [(M-H)-C <sub>10</sub> H <sub>10</sub> NO <sub>4</sub> ] <sup>-</sup><br>179.0225 [(M-H)-C <sub>8</sub> H <sub>15</sub> O <sub>7</sub> ] <sup>-</sup><br>163.9996 [(M-H)-C <sub>9</sub> H <sub>18</sub> O <sub>7</sub> ] <sup>-</sup>                                                                                                                                                                                                                                                 | -                                        | no                                | 3                      | M402T823                                  |
| 13.78    | 353.0871                             | 191.0559 [(M-H)-C <sub>9</sub> H <sub>6</sub> O <sub>3</sub> ] <sup>-</sup><br>707.1800 [2M-H] <sup>-</sup>                                                                                  | C <sub>16</sub> H <sub>17</sub> O <sub>9</sub>                | 353.0878                               | 0.7         | 2.1         | 4.3          | Caffeoylquinic acid C          | -            | 191.0562 [(M-H)-C <sub>9</sub> H <sub>6</sub> O <sub>3</sub> ] <sup>-</sup><br>179.0298 [(M-H)-C <sub>7</sub> H <sub>10</sub> O <sub>5</sub> ] <sup>-</sup><br>173.0448 [(M-H)-C <sub>9</sub> H <sub>8</sub> O <sub>4</sub> ] <sup>-</sup><br>161.0238 [(M-H)-C <sub>7</sub> H <sub>12</sub> O <sub>6</sub> ] <sup>-</sup>                                                                                                                                                                     | -                                        | no                                | 3                      | M353T832                                  |
| 15.67    | 533.0982                             | -                                                                                                                                                                                            | C <sub>24</sub> H <sub>21</sub> O <sub>14</sub>               | 533.0937                               | 4.5         | 8           | 52.7         | Kaempferol-malonylglucoside    |              | 287.0775 [(M-H)-C <sub>9</sub> H <sub>11</sub> O <sub>8</sub> ] <sup>-</sup>                                                                                                                                                                                                                                                                                                                                                                                                                   | -                                        | no                                | 3                      | M533T931                                  |
| 16.05    | 386.1084                             | 224.0560 [(M-H)-C <sub>6</sub> H <sub>10</sub> O <sub>5</sub> ] <sup>-</sup>                                                                                                                 | C <sub>16</sub> H <sub>20</sub> NO <sub>10</sub>              | 386.1093                               | 0.9         | 2.3         | 0.4          | HDMBOA-glucoside               | -            | 224.0563 [(M-H)-C <sub>6</sub> H <sub>10</sub> O <sub>5</sub> ] <sup>-</sup><br>196.0620 [(M-H)-C <sub>7</sub> H <sub>10</sub> O <sub>6</sub> ] <sup>-</sup><br>168.0665 [(M-H)-C <sub>8</sub> H <sub>10</sub> O <sub>7</sub> ] <sup>-</sup>                                                                                                                                                                                                                                                   | -                                        | no                                | 3                      | M386T977                                  |
| 16.66    | 367.1024                             | 191.0542 [(M-H)-C <sub>10</sub> H <sub>8</sub> O <sub>3</sub> ] <sup>-</sup>                                                                                                                 | C <sub>17</sub> H <sub>19</sub> O <sub>9</sub>                | 367.1035                               | 1.0         | 2.8         | 4.4          | Feruloylquinic acid C          | -            | 191.0558 [(M-H)-C <sub>10</sub> H <sub>8</sub> O <sub>3</sub> ] <sup>-</sup>                                                                                                                                                                                                                                                                                                                                                                                                                   | -                                        | no                                | 3                      | M367T1003                                 |
| 18.60    | 593.1531                             | -                                                                                                                                                                                            | C <sub>27</sub> H <sub>29</sub> O <sub>15</sub>               | 593.1512                               | -1.9        | -3.2        | 8.7          | (Iso)orientin-glucoside        | -            | 473.01078 [(M-H)-C <sub>4</sub> H <sub>8</sub> O <sub>4</sub> ] <sup>-</sup><br>447.0938 [(M-H)-C <sub>6</sub> H <sub>10</sub> O <sub>4</sub> ] <sup>-</sup><br>429.0816 [(M-H)-C <sub>6</sub> H <sub>12</sub> O <sub>5</sub> ] <sup>-</sup><br>357.0602 [(M-H)-C <sub>9</sub> H <sub>16</sub> O <sub>7</sub> ] <sup>-</sup><br>327.0497 [(M-H)-C <sub>10</sub> H <sub>18</sub> O <sub>8</sub> ] <sup>-</sup><br>285.0392 [(M-H)-C <sub>12</sub> H <sub>20</sub> O <sub>9</sub> ] <sup>-</sup> | -                                        | no                                | 3                      | M593T1114                                 |
| 19.71    | 449.1074                             | 287.0555 [(M-H)-C <sub>6</sub> H <sub>10</sub> O <sub>5</sub> ] <sup>-</sup>                                                                                                                 | C <sub>21</sub> H <sub>21</sub> O <sub>11</sub>               | 449.1089                               | 1.5         | 3.3         | 5.1          | Eriodictyol-glucoside          | CHEBI:65860  | 287.0532 [(M-H)-C <sub>6</sub> H <sub>10</sub> O <sub>5</sub> ] <sup>-</sup><br>193.0159 [(M-H)-C <sub>12</sub> H <sub>16</sub> O <sub>6</sub> ] <sup>-</sup><br>151.0031 [(M-H)-C <sub>14</sub> H <sub>18</sub> O <sub>7</sub> ] <sup>-</sup>                                                                                                                                                                                                                                                 | -                                        | no                                | 3                      | M449T1234                                 |

|       |          |                              |                                                 |          |      |      |      |                                               |             |                                                                                                                                                                                                                                                                                                                                                                              |         |     |   |           |
|-------|----------|------------------------------|-------------------------------------------------|----------|------|------|------|-----------------------------------------------|-------------|------------------------------------------------------------------------------------------------------------------------------------------------------------------------------------------------------------------------------------------------------------------------------------------------------------------------------------------------------------------------------|---------|-----|---|-----------|
| 20.85 | 577.1556 | -                            | C <sub>27</sub> H <sub>29</sub> O <sub>14</sub> | 577.1563 | 0.6  | 1.1  | 5.1  | Kaempferol-dirhamnoside                       |             | 458.1141 [(M-H)-C <sub>4</sub> H <sub>8</sub> O <sub>4</sub> ] <sup>-</sup><br>413.0863 [(M-H)-C <sub>6</sub> H <sub>12</sub> O <sub>5</sub> ] <sup>-</sup><br>293.0440 [(M-H)-C <sub>10</sub> H <sub>20</sub> O <sub>9</sub> ] <sup>-</sup>                                                                                                                                 | -       | no  | 2 | M577T1253 |
| 21.08 | 609.1481 | -                            | C <sub>27</sub> H <sub>29</sub> O <sub>16</sub> | 609.1461 | 0.8  | 1.3  | 6.6  | Rutin                                         | CHEBI:28527 | 463.0881 [(M-H)-C <sub>6</sub> H <sub>10</sub> O <sub>4</sub> ] <sup>-</sup><br>300.0269 [(M-H)-C <sub>12</sub> H <sub>21</sub> O <sub>9</sub> ] <sup>*-</sup>                                                                                                                                                                                                               | mzCloud | yes | 1 | M609T1268 |
| 21.79 | 463.0880 | 927.1787 [2M-H] <sup>-</sup> | C <sub>21</sub> H <sub>19</sub> O <sub>12</sub> | 463.0882 | 0.2  | 0.5  | 1.7  | Quercetin- <i>O</i> -glucoside                | CHEBI:64621 | 300.0273 [(M-H)-C <sub>6</sub> H <sub>12</sub> O <sub>5</sub> ] <sup>*-</sup><br>271.0236 [(M-H)-C <sub>7</sub> H <sub>12</sub> O <sub>6</sub> ] <sup>-</sup>                                                                                                                                                                                                                | mzCloud | no  | 3 | M463T1312 |
| 23.40 | 491.1173 | -                            | C <sub>23</sub> H <sub>23</sub> O <sub>12</sub> | 491.1195 | 2.2  | 4.6  | 47.7 | Dimethyletherpentahydroxylflavonol -glucoside | -           | 476.0903 [(M-H)-CH <sub>3</sub> ] <sup>*-</sup><br>371.0774 [(M-H)-C <sub>4</sub> H <sub>8</sub> O <sub>4</sub> ] <sup>-</sup><br>329.0642[(M-H)-C <sub>6</sub> H <sub>10</sub> O <sub>5</sub> ] <sup>-</sup><br>314.0412[(M-H)-C <sub>7</sub> H <sub>13</sub> O <sub>5</sub> ] <sup>*-</sup><br>299.0200[(M-H)-C <sub>8</sub> H <sub>16</sub> O <sub>5</sub> ] <sup>-</sup> | -       | no  | 3 | M491T1406 |
| 23.47 | 593.1516 | 629.1279 [M+Cl] <sup>-</sup> | C <sub>27</sub> H <sub>29</sub> O <sub>15</sub> | 593.1512 | -0.4 | -0.7 | 3.5  | Kaempferol-3- <i>O</i> -rutinoside            | CHEBI:69657 | 447.0900 [(M-H)-C <sub>6</sub> H <sub>10</sub> O <sub>4</sub> ] <sup>-</sup><br>285.0392 [(M-H)-C <sub>12</sub> H <sub>20</sub> O <sub>9</sub> ] <sup>-</sup>                                                                                                                                                                                                                | -       | yes | 1 | M593T1412 |
| 24.00 | 623.1623 | -                            | C <sub>28</sub> H <sub>31</sub> O <sub>16</sub> | 623.1618 | -0.5 | -0.8 | 4.0  | Isorhamnetin-rutinoside                       | -           | 315.0493 [(M-H)-C <sub>12</sub> H <sub>20</sub> O <sub>9</sub> ] <sup>-</sup><br>300.0260 [(M-H)-C <sub>13</sub> H <sub>23</sub> O <sub>9</sub> ] <sup>*-</sup>                                                                                                                                                                                                              | -       | no  | 3 | M623T1442 |
| 24.27 | 447.0930 | -                            | C <sub>21</sub> H <sub>19</sub> O <sub>11</sub> | 447.0933 | 0.3  | 0.6  | 9.8  | Kaempferol-3- <i>O</i> -glucoside             | CHEBI:30200 | 284.0317 [(M-H)-C <sub>6</sub> H <sub>11</sub> O <sub>6</sub> ] <sup>*-</sup><br>255.0292 [(M-H)-C <sub>7</sub> H <sub>12</sub> O <sub>6</sub> ] <sup>-</sup><br>227.0341 [(M-H)-C <sub>8</sub> H <sub>12</sub> O <sub>7</sub> ] <sup>-</sup>                                                                                                                                | MoNA    | no  | 2 | M447T1460 |
| 25.09 | 447.0925 | -                            | C <sub>21</sub> H <sub>19</sub> O <sub>11</sub> | 447.0933 | 0.8  | 1.7  | 2.0  | Quercetin rhamnoside                          | -           | 357.0601 [(M-H)-C <sub>3</sub> H <sub>6</sub> O <sub>3</sub> ] <sup>-</sup><br>327.0501 [(M-H)-C <sub>4</sub> H <sub>8</sub> O <sub>4</sub> ] <sup>-</sup><br>298.0466 [(M-H)-C <sub>5</sub> H <sub>9</sub> O <sub>5</sub> ] <sup>*-</sup>                                                                                                                                   | -       | no  | 3 | M447T1510 |
| 26.89 | 575.1414 | -                            | C <sub>27</sub> H <sub>27</sub> O <sub>14</sub> | 575.1406 | -0.8 | -1.4 | 4.4  | Maysin                                        | CHEBI:70206 | 473.1078 [(M-H)-C <sub>4</sub> H <sub>6</sub> O <sub>3</sub> ] <sup>-</sup><br>411.0709 [(M-H)-C <sub>6</sub> H <sub>12</sub> O <sub>5</sub> ] <sup>-</sup><br>297.0395 [(M-H)-C <sub>11</sub> H <sub>18</sub> O <sub>8</sub> ] <sup>-</sup>                                                                                                                                 | -       | no  | 3 | M575T1614 |
| 30.93 | 607.1662 | -                            | C <sub>28</sub> H <sub>31</sub> O <sub>15</sub> | 607.1668 | 0.6  | 1.1  | 2.3  | Chrysoeriol-glucosylrhamnoside                |             | 575.1403 [(M-H)-CH <sub>4</sub> O] <sup>-</sup><br>473.1092 [(M-H)-C <sub>5</sub> H <sub>10</sub> O <sub>4</sub> ] <sup>-</sup><br>411.0708 [(M-H)-C <sub>7</sub> H <sub>16</sub> O <sub>6</sub> ] <sup>-</sup><br>297.0401 [(M-H)-C <sub>12</sub> H <sub>22</sub> O <sub>9</sub> ] <sup>-</sup>                                                                             | -       | no  | 3 | M607T1733 |

<sup>a</sup> Precursor was [M-H]<sup>-</sup>. AutoMS<sup>2</sup> mode collision energies were set according to *m/z* ratios of precursor.

<sup>b</sup> MassBank.jp: <http://www.massbank.jp/>; MoNA: <http://mona.fiehnlab.ucdavis.edu/>; mzCloud: <https://www.mzcloud.org/>.

<sup>c</sup> According to Sumner et al. 2007 (Metabolomics 3:211-221).
