# Supplementary material for: Metabotyping of 30 maize hybrids under early-sowing conditions reveals potential marker-metabolites for breeding
Source: PubMed Central journal article supplement (PMC6208756; doi:10.1007/s11306-018-1427-8), 2018-09-26
Supplement: 11306_2018_1427_MOESM5_ESM.pdf [file 11306_2018_1427_MOESM5_ESM.pdf]

Title: **Metabotyping of 30 maize hybrids under early-sowing conditions reveals potential marker metabolites for breeding**

Authors: Nadia Lamari, Vanessa Zhendre, Maria Urrutia, Stéphane Bernillon, Mickaël Maucourt, Catherine Deborde, Duyen Prodhomme, Daniel Jacob, Patricia Ballias, Dominique Rolin, H el ene Sellier, Dominique Rabier, Yves Gibon, Catherine Giauffrey, Annick Moing

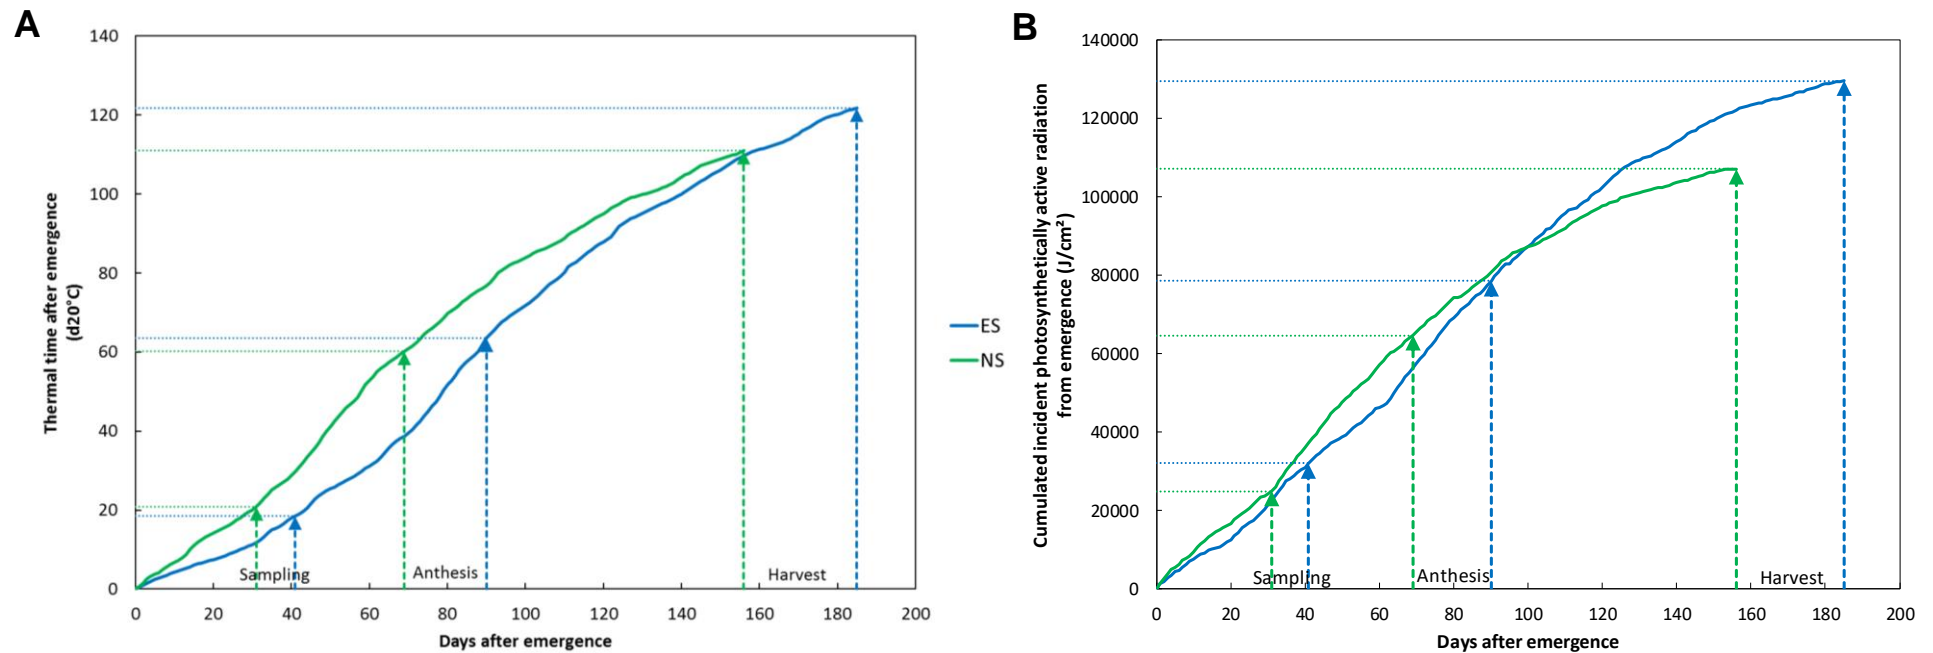

**Supplementary Figure S1:** Environmental conditions for the maize plants cultivated in a field from emergence to grain maturity. Blue, early sowing (ES); Green, normal sowing (NS). The three pairs of arrows indicate the time of leaf sampling for the biochemical analyses, plant anthesis and final harvest.

A. Cumulative thermal times. Thermal times were calculated as the equivalent number of days at 20°C after emergence for each sowing condition. B. Cumulated incident photosynthetically active radiation.
