# Supplementary material for: Metabotyping of 30 maize hybrids under early-sowing conditions reveals potential marker-metabolites for breeding
Source: PubMed Central journal article supplement (PMC6208756; doi:10.1007/s11306-018-1427-8), 2018-09-26
Supplement: 11306_2018_1427_MOESM6_ESM.pdf [file 11306_2018_1427_MOESM6_ESM.pdf]

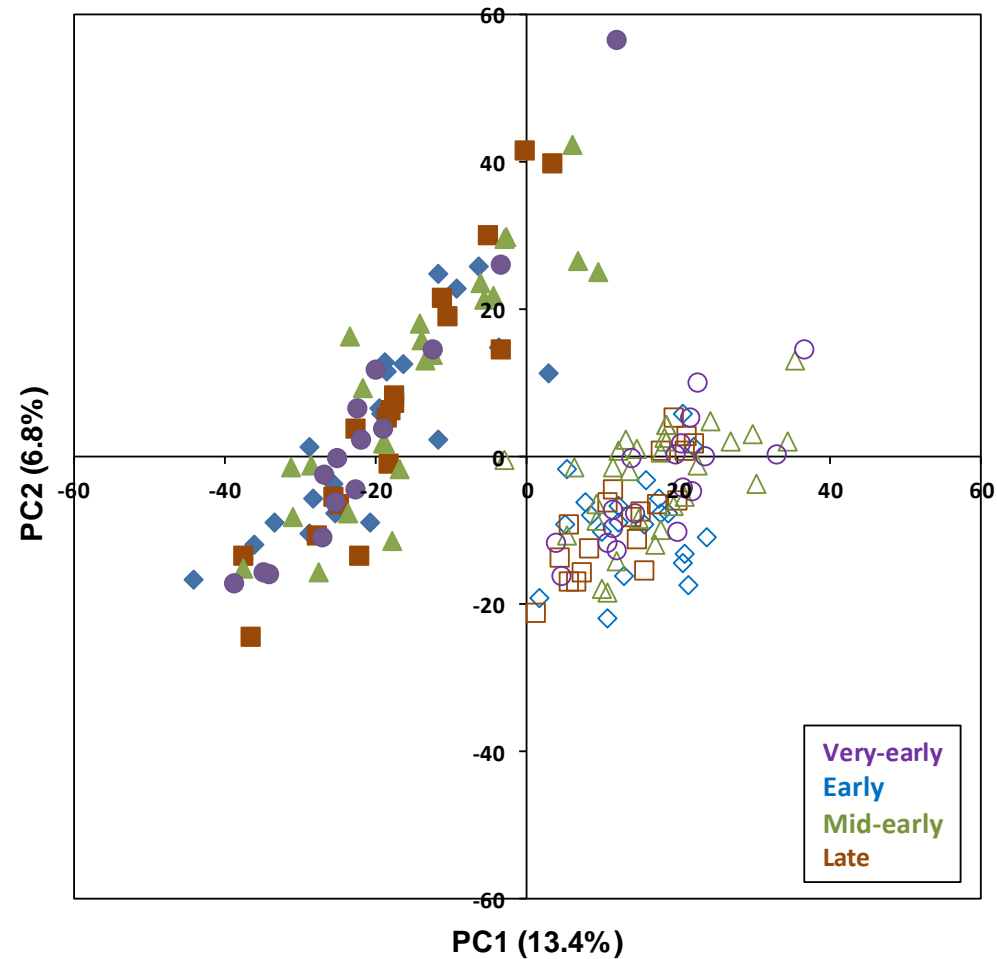

**Supplementary Figure S2:** Principal component analysis (PCA) of 2,868 metabolite features and starch measured in young maize leaf of 30 hybrids in the normal (full symbols) and early sowing (open symbols) conditions. PCA scores plot of the first two principal components as in Figure 1. Scores symbols correspond to the genotype silage-earliness groups defined in Table 1: Very-early, purple circle; Early, blue diamond; Mid-early, green triangle; Late, brown square.
