# Supplementary material for: Metabotyping of 30 maize hybrids under early-sowing conditions reveals potential marker-metabolites for breeding
Source: PubMed Central journal article supplement (PMC6208756; doi:10.1007/s11306-018-1427-8), 2018-09-26
Supplement: 11306_2018_1427_MOESM9_ESM.pdf [file 11306_2018_1427_MOESM9_ESM.pdf]

**Supplementary Table S5:** Annotation of MS markers based on LC-QTOF-MS and MS/MS data in maize leaves.

| Variable Name            | RT (min) | Marker ion m/z | Ion type            | Putative Molecular Formula of ion                              | Calculated m/z of ion | Error (mDa) | Error (ppm) | mSigma value | MS <sup>2</sup> precursor m/z | LC-MS/MS Negative mode spectrum                                                                                                                                                                                                                                                                                                                                                      | Putative Name              |
|--------------------------|----------|----------------|---------------------|----------------------------------------------------------------|-----------------------|-------------|-------------|--------------|-------------------------------|--------------------------------------------------------------------------------------------------------------------------------------------------------------------------------------------------------------------------------------------------------------------------------------------------------------------------------------------------------------------------------------|----------------------------|
| Silage-earliness markers |          |                |                     |                                                                |                       |             |             |              |                               |                                                                                                                                                                                                                                                                                                                                                                                      |                            |
| M843T1751                | 29.18    | 843.1944       | -                   | -                                                              | -                     | -           | -           | -            | 843.19 ± 1.5                  | Signal too low                                                                                                                                                                                                                                                                                                                                                                       | -                          |
| M741T1917                | 31.95    | 741.2325       | -                   | -                                                              | -                     | -           | -           | -            | 741.23 ± 1.5                  | Signal too low                                                                                                                                                                                                                                                                                                                                                                       | -                          |
| M403T2001                | 33.35    | 403.1026       | [M-H] <sup>-</sup>  | C <sub>20</sub> H <sub>19</sub> O <sub>9</sub>                 | 403.1021              | 0.9         | 2.2         | 57.6         | 403.10 ± 1.5                  | 403.1026 [M-H] <sup>-</sup><br>328.0578 [(M-H)-C <sub>3</sub> H <sub>7</sub> O <sub>2</sub> ] <sup>-</sup><br>313.0340 [(M-H)-C <sub>4</sub> H <sub>10</sub> O <sub>2</sub> ] <sup>-</sup>                                                                                                                                                                                           | -                          |
| Sowing condition markers |          |                |                     |                                                                |                       |             |             |              |                               |                                                                                                                                                                                                                                                                                                                                                                                      |                            |
| M713T795                 | 13.25    | 713.2026       | [2M-H] <sup>-</sup> | C <sub>30</sub> H <sub>37</sub> N <sub>2</sub> O <sub>18</sub> | 713.2047              | 2.1         | 3           | 76.4         | 713.20 ± 1.5                  | 713.2026 [2M-H] <sup>-</sup><br>356.0958 [M-H] <sup>-</sup><br>194.0460 [(M-H)-C <sub>6</sub> H <sub>10</sub> O <sub>5</sub> ] <sup>-</sup>                                                                                                                                                                                                                                          | HMBOA-glucoside            |
| M707T993                 | 16.55    | 707.1091       | [2M-H] <sup>-</sup> | C <sub>30</sub> H <sub>27</sub> O <sub>20</sub>                | 707.1101              | 1.0         | 1.4         | 109.6        | 707.10 ± 1.5                  | 707.1091 [2M-H] <sup>-</sup><br>353.0469 [M-H] <sup>-</sup><br>351.0335[(M-H)-2H] <sup>-</sup><br>173.0100 [(M-H)-C <sub>9</sub> H <sub>8</sub> O <sub>4</sub> ] <sup>-</sup>                                                                                                                                                                                                        | Caffeoylisocitrate         |
| M329T2126                | 35.43    | 329.0647       | [M-H] <sup>-</sup>  | C <sub>17</sub> H <sub>13</sub> O <sub>7</sub>                 | 329.0667              | 1.9         | 5.9         | 42.1         | 329.07 ± 1.5                  | 329.0653 [M-H] <sup>-</sup><br>314.0416 [(M-H)-CH <sub>3</sub> ] <sup>-</sup><br>299.0186 [(M-H)-2CH <sub>3</sub> ] <sup>-</sup><br>271.0238 [(M-H)-2CH <sub>3</sub> -CO] <sup>-</sup><br>227.0343 [(M-H)-C <sub>5</sub> H <sub>8</sub> O <sub>2</sub> ] <sup>-</sup>                                                                                                                | Tricin                     |
| M224T977                 | 16.28    | 224.0554       | Fragment            | C <sub>10</sub> H <sub>10</sub> NO <sub>5</sub>                | 224.0564              | 1.0         | 4.5         | 26.5         | 386.11 ± 1.5                  | 386.1078 [M-H] <sup>-</sup><br>224.0560 [(M-H)- C <sub>6</sub> H <sub>10</sub> O <sub>5</sub> ] <sup>-</sup><br>196.0622 [(M-H)- C <sub>7</sub> H <sub>10</sub> O <sub>6</sub> ] <sup>-</sup>                                                                                                                                                                                        | HDMBOA-glucoside           |
| M675T639                 | 10.65    | 675.1917       | [2M-H] <sup>-</sup> | C <sub>32</sub> H <sub>35</sub> O <sub>16</sub>                | 675.1931              | 1.3         | 1.9         | 85.3         | 675.18 ± 1.5                  | 675.1917 [2M-H] <sup>-</sup><br>337.0909 [M-H] <sup>-</sup><br>163.0400 [(M-H)-C <sub>7</sub> H <sub>10</sub> O <sub>5</sub> ] <sup>-</sup>                                                                                                                                                                                                                                          | Coumaroylquinic B          |
| M447T614                 | 10.23    | 447.0912       | [M-H] <sup>-</sup>  | C <sub>21</sub> H <sub>19</sub> O <sub>11</sub>                | 447.0933              | 2.1         | 4.7         | 55.3         | 447.09 ± 1.5                  | 447.0912 [M-2H] <sup>-</sup><br>285.0383 [(M-H)-C <sub>6</sub> H <sub>10</sub> O <sub>5</sub> ] <sup>-</sup><br>284.0308 [(M-H)-C <sub>6</sub> H <sub>11</sub> O <sub>5</sub> ] <sup>-</sup>                                                                                                                                                                                         | Cyanidin-glucoside         |
| M465T628                 | 10.46    | 465.10         | [M-H] <sup>-</sup>  | C <sub>21</sub> H <sub>21</sub> O <sub>12</sub>                | 465.1038              | 2.1         | 4.4         | 49.0         | 465.10 ± 1.5                  | 465.1021 [M-H] <sup>-</sup><br>447.0917 [(M-H)-H <sub>2</sub> O] <sup>-</sup><br>437.1065 [(M-H)-CO] <sup>-</sup><br>303.0491 [(M-H)-C <sub>6</sub> H <sub>10</sub> O <sub>5</sub> ] <sup>-</sup><br>285.0383 [(M-H)-C <sub>6</sub> H <sub>10</sub> O <sub>5</sub> -H <sub>2</sub> O] <sup>-</sup><br>275.0539 (M-H)-C <sub>6</sub> H <sub>10</sub> O <sub>5</sub> -CO] <sup>-</sup> | Dihydroquercetin-glucoside |
