# Supplementary material for: Metabotyping of 30 maize hybrids under early-sowing conditions reveals potential marker-metabolites for breeding
Source: PubMed Central journal article supplement (PMC6208756; doi:10.1007/s11306-018-1427-8), 2018-09-26
Supplement: 11306_2018_1427_MOESM10_ESM.pdf [file 11306_2018_1427_MOESM10_ESM.pdf]

Journal: Metabolomics

**Title: Metabotyping of 30 maize hybrids under early-sowing conditions reveals potential marker metabolites for breeding**

Authors: Nadia Lamari, Vanessa Zhendre, Maria Urrutia, Stéphane Bernillon, Mickaël Maucourt, Catherine Deborde, Duyen Prodhomme, Daniel Jacob, Patricia Ballias, Dominique Rolin, H el ene Sellier, Dominique Rabier, Yves Gibon, Catherine Giauffrey, Annick Moing

**Supplementary text 2**

**Tentative validation of 2013 silage-earliness markers in 2014.**

***Materials and Methods***

The genotypes, culture conditions and leaf harvest protocol were the same in 2014 and 2013. For the second year, sowing was done on 6 May 2014 which corresponds to a normal-sowing condition. The youngest ligulated-leaf samples were harvested on 17 June 2014 for 28 genotypes common to both years.

We selected the 25 variables with VIP higher than 2.5 in the OSC-OSC-PLS of 2013 data for silage groups (Table S5) and searched for them in 2014 analytical data. For raffinose with absolute quantification data, <sup>1</sup>H-NMR quantification of raffinose was performed in 2014 as described for 2013 NMR data. For the MS-based signatures with relative quantification, the corresponding variable of each MS-based signature of 2013 analytical batch was searched in the 2014 analytical batch based on exact mass and retention time (Table A in Supplementary text 2). For raffinose, mean comparisons between the silage groups in 2014 were determined using Tukey's test ( $P < 0.05$ ). For the MS-based signatures, we calculated Pearson correlation coefficient and the corresponding  $P$ -value between each 2013 variable and its corresponding 2014 variable using the ls-means of 28 genotypes in the two years.

***Results***

Concerning raffinose, in 2014 its content followed a pattern similar to that of 2013 (Fig. I in Supplementary text 2), with a progressive increase between the very-early and late silage-earliness groups and a significant difference between the very-early and late group means (Tukey's test,  $P < 0.05$ ). Concerning the MS-based signatures, we found 17 variables out of the 25 variables in the 2014 MS-based variables (Table A in Supplementary text 2). The correlation coefficients for these 17 variables are reported in Table A with their  $P$ -values. For 15 out of the 17 variables, the correlation between 2013 and 2014 data was positive and significant, with 11  $P$ -values lower than 0.0001. Therefore, the tendencies observed in 2013 data for silage-earliness for 25 variables seem confirmed for 16 of them including raffinose.

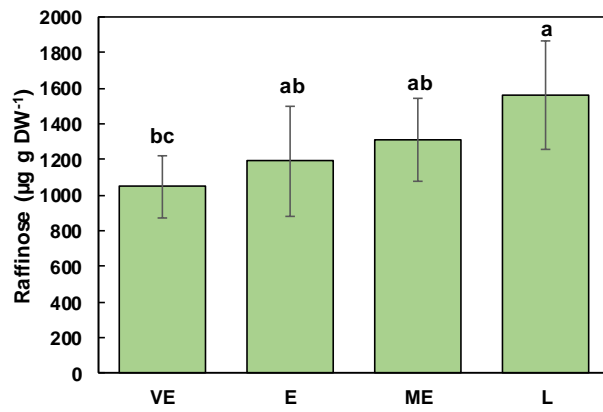

**Figure I:** Mean contents for each silage-earliness group in 2014 for raffinose. VE, very-early; E, early; ME, mid-early; L, late. Vertical bars represent standard deviations. Bars accompanied by the same letter are not significantly different according to Tukey's test ( $P < 0.05$ ).

**Table A.** Variable description and correlation between each of the 17 MS-based variables of 2013 (out of the 24 MS-based variables highlighted in the OSC-OSC-PLS analysis for silage-earliness in 2013) and its corresponding variable searched for in 2014 MS data. n=28.

| 2013                                                    |        |          | 2014                   |        |          | 2013-2014 Pearson correlation | P-value |
|---------------------------------------------------------|--------|----------|------------------------|--------|----------|-------------------------------|---------|
| Variable                                                | Rt (s) | m/z      | Corresponding variable | Rt (s) | m/z      |                               |         |
| M247T748                                                | 748.0  | 247.0675 | M247T741               | 741.3  | 247.0601 | 0.8468                        | <0.0001 |
| M400T1011                                               | 1010.8 | 400.0874 | M400T1001              | 1001.2 | 400.0879 | 0.6873                        | <0.0001 |
| M414T806                                                | 806.0  | 414.0909 | M414T804               | 803.6  | 414.0966 | 0.2654                        | 0.17219 |
| M478T1423                                               | 1422.9 | 478.1321 | M478T1413              | 1413.1 | 478.1356 | 0.6095                        | 0.00058 |
| M484T765                                                | 774.3  | 483.9616 | M484T751               | 751.4  | 484.1038 | 0.5000                        | 0.00675 |
| M486T650                                                | 650.3  | 486.1209 | M486T651               | 651.0  | 486.1237 | 0.7502                        | <0.0001 |
| M491T1406- dimethyletherpenta-hydroxyflavonol-glucoside | 1406.1 | 491.1167 | M491T1405              | 1405.1 | 491.1211 | 0.7865                        | <0.0001 |
| M491T1527                                               | 1527.3 | 491.1180 | M491T1529              | 1528.6 | 491.1207 | 0.8132                        | <0.0001 |
| M505T1139                                               | 1139.3 | 505.1617 | M505T1130              | 1130.0 | 505.1675 | 0.6175                        | 0.00046 |
| M513T573                                                | 572.5  | 513.1255 | M513T608               | 607.9  | 513.1454 | 0.1512                        | 0.44257 |
| M521T1718                                               | 1717.1 | 521.1291 | M521T1718              | 1717.8 | 521.1311 | 0.7013                        | <0.0001 |
| M533T1587                                               | 1586.6 | 533.2020 | M533T1585              | 1585.2 | 533.2053 | 0.7940                        | <0.0001 |
| M535T1190                                               | 1191.2 | 535.1796 | M535T1184              | 1184.2 | 535.1814 | 0.6717                        | <0.0001 |
| M537T1440                                               | 1440.0 | 537.1562 | M537T1433              | 1433.4 | 537.1609 | 0.5502                        | 0.00242 |
| M643T1261                                               | 1260.7 | 643.2209 | M643T1261              | 1260.5 | 643.2234 | 0.6955                        | <0.0001 |
| M669T1205                                               | 1205.1 | 669.1992 | M669T1203              | 1203.4 | 669.2037 | 0.7211                        | <0.0001 |
| M787T1719                                               | 1718.7 | 787.1705 | M787T1722              | 1722.4 | 787.1791 | 0.7523                        | <0.0001 |
