# Supplementary material for: Metabotyping of 30 maize hybrids under early-sowing conditions reveals potential marker-metabolites for breeding
Source: Springer Nature journal article supplement (doi:10.1007/s11306-018-1427-8), 2018-09-26
Supplement: MOESM1 [file 11306_2018_1427_MOESM1_ESM.pdf]

Journal: Metabolomics

Title: **Metabotyping of 30 maize hybrids under early-sowing conditions reveals potential marker metabolites for breeding**

Authors: Nadia Lamari, Vanessa Zhendre, Maria Urrutia, Stéphane Bernillon, Mickaël Maucourt, Catherine Deborde, Duyen Prodhomme, Daniel Jacob, Patricia Ballias, Dominique Rolin, Hélène Sellier, Dominique Rabier, Yves Gibon, Catherine Giauffrey, Annick Moing

**Supplementary Table S1:** Environmental variables for the field experiment for two following plant development and growth periods for each sowing condition: sowing to emergence, and emergence to leaf sample harvest. ES, early-sowing. NS, normal-sowing.

| <b>Sowing condition</b> | <b>Growth period</b>             | <b>Duration of period (days)</b> | <b>Mean global radiation (J/cm<sup>2</sup> per day)</b> | <b>Total rainfall over the period (mm)</b> | <b>Mean air temperature (°C)</b> | <b>Maximum air vapor pressure deficit (Pa)</b> |
|-------------------------|----------------------------------|----------------------------------|---------------------------------------------------------|--------------------------------------------|----------------------------------|------------------------------------------------|
| ES                      | Sowing to emergence              | 19                               | 1 727                                                   | 10.0                                       | 10.8                             | 1.99                                           |
|                         | Emergence to leaf sample harvest | 41                               | 1 620                                                   | 90.5                                       | 12.1                             | 1.85                                           |
| NS                      | Sowing to emergence              | 22                               | 1 467                                                   | 61.5                                       | 10.4                             | 1.22                                           |
|                         | Emergence to leaf sample harvest | 31                               | 1 654                                                   | 78.0                                       | 15.9                             | 1.85                                           |
