# Supplementary material for: Metabotyping of 30 maize hybrids under early-sowing conditions reveals potential marker-metabolites for breeding
Source: Springer Nature journal article supplement (doi:10.1007/s11306-018-1427-8), 2018-09-26
Supplement: MOESM11 [file 11306_2018_1427_MOESM11_ESM.pdf]

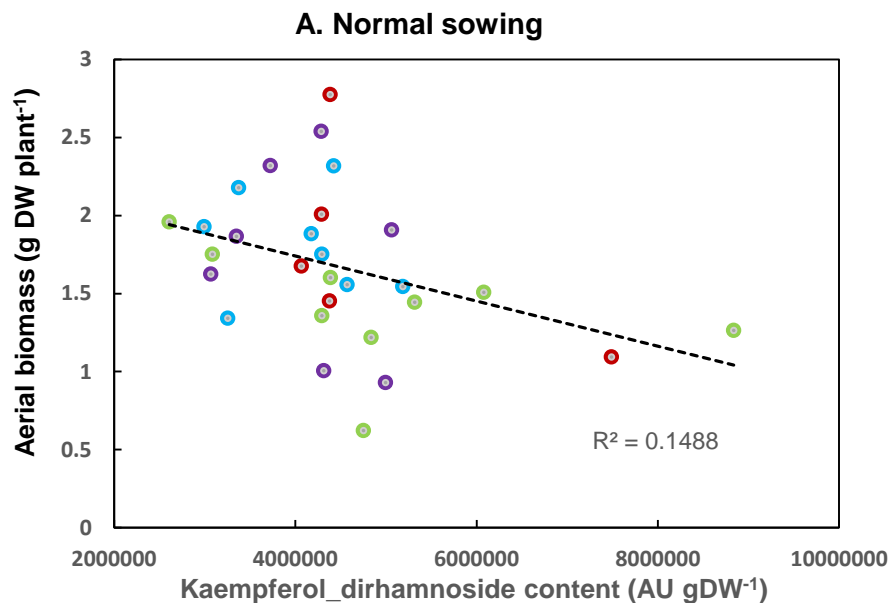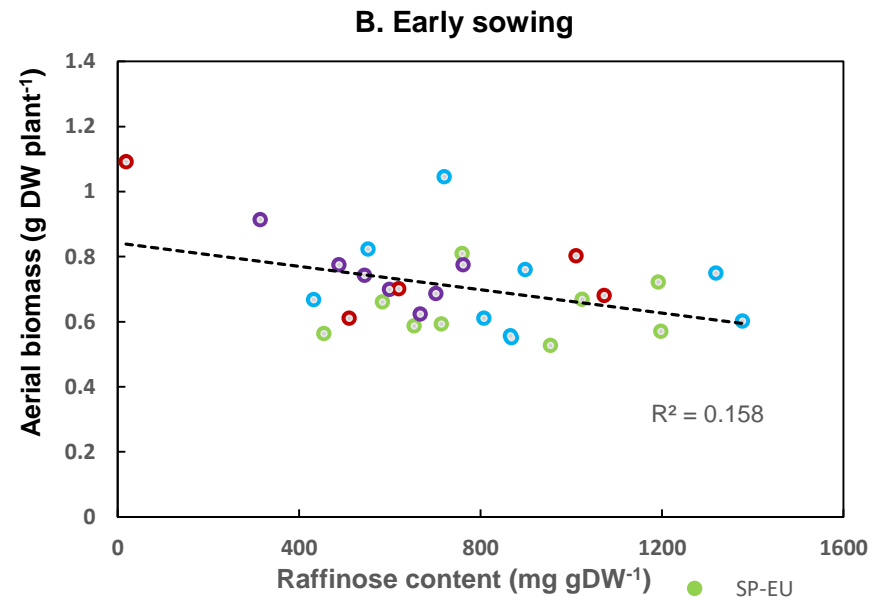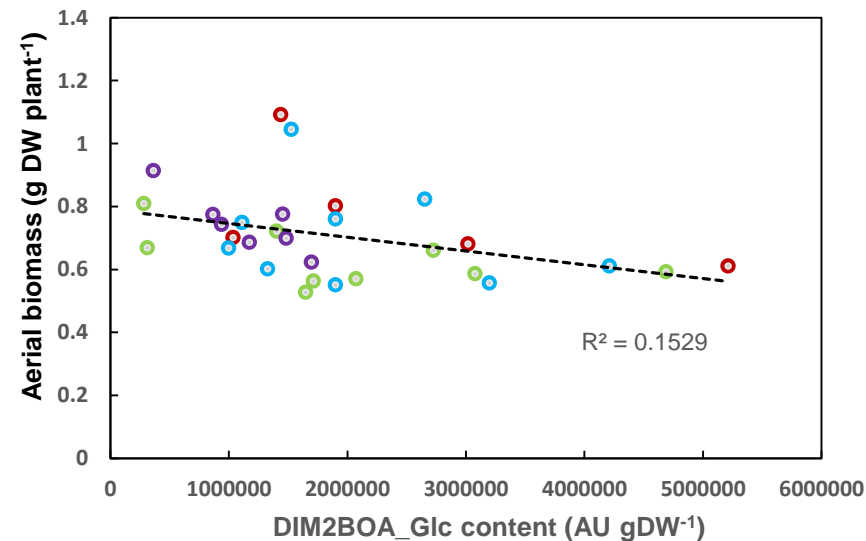

**Supplementary Figure S3:** Metabolites directly correlated with aerial biomass in the normal sowing or early sowing condition in Figures 4A or 4B networks. Biomass-metabolite biplots for the genotype lsmeans. Genotypes are colored according to their group (European, green; lodent, purple; Lancaster, red; Stiff Stalk, blue). The regression line and  $R^2$  value correspond to all genotypes.
